# Supplementary material for: The Chloroplast Genome of Endive (Cichorium endivia L.): Cultivar Structural Variants and Transcriptome Responses to Stress Due to Rain Extreme Events
Source: MDPI journal article supplement (doi:10.3390/genes14091829), 2023-09-21
Supplement: s1 [file s1]

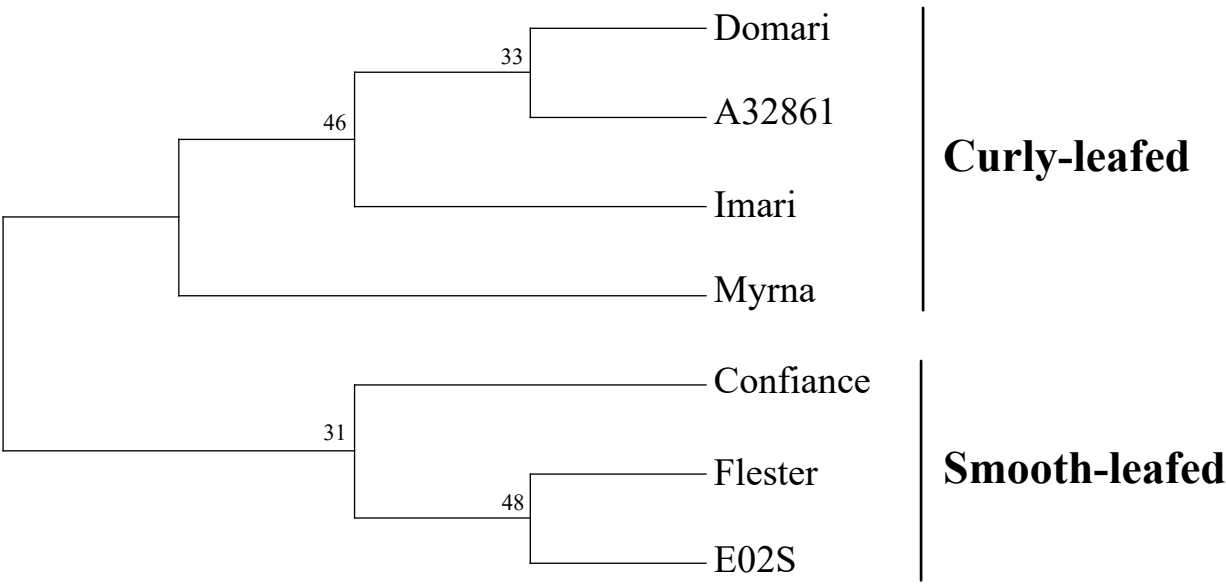

**Figure S3.** Phylogenetic tree from maximum-likelihood (ML) method based on concatenated SNP sequence alignment from the seven *C. endivia* cultivars. Numbers refer to ML bootstrap support values.
