# Supplementary material for: The Chloroplast Genome of Endive (Cichorium endivia L.): Cultivar Structural Variants and Transcriptome Responses to Stress Due to Rain Extreme Events
Source: MDPI journal article supplement (doi:10.3390/genes14091829), 2023-09-21
Supplement: s1 [file s1]

**Table S3.** Nutrient content variation (mg g<sup>-1</sup> dry weight) of leaves in year affected by heavy rain

| Compounds <sup>a</sup> | MRY <sup>b</sup>    |                     | HRY                 |                     | Significance <sup>c</sup> |             |             |
|------------------------|---------------------|---------------------|---------------------|---------------------|---------------------------|-------------|-------------|
|                        | Domari              | Flester             | Domari              | Flester             | G                         | Y           | GxY         |
| αGLC                   | 40.36±9.83          | 37.95±6.88          | 30.77±4.64          | 31.14±4.84          | <i>n.s.</i>               | *           | <i>n.s.</i> |
| βGLC                   | 77.06±17.56         | 72.13±13.67         | 59.83±10.4          | 58.28±8.91          | <i>n.s.</i>               | *           | <i>n.s.</i> |
| FRU                    | 148.21±35.64        | 142.64±26.08        | 115.68±11.12        | 114.86±17.94        | <i>n.s.</i>               | *           | <i>n.s.</i> |
| INUL                   | 2.59±0.42a          | 1.3±0.3b            | 1.4±0.59b           | 1.07±0.08b          | ***                       | ***         | **          |
| KES                    | 8.6±2.13            | 4.22±0.77           | 4.43±0.95           | 2.18±0.38           | ***                       | ***         | <i>n.s.</i> |
| SUC                    | 34.65±5.97          | 22.53±2.22          | 27.9±2.91           | 20.77±2.82          | ***                       | **          | <i>n.s.</i> |
| <b>CAR-T</b>           | <b>311.47±64.11</b> | <b>280.77±47.75</b> | <b>147.94±19.14</b> | <b>136.88±19.95</b> | <i>n.s.</i>               | ***         | <i>n.s.</i> |
| CA                     | 3.91±1.41           | 4.46±1.15           | 3.33±0.61           | 5.41±1.08           | <i>n.s.</i>               | <i>n.s.</i> | <i>n.s.</i> |
| FA                     | 0.09±0.03           | 0.11±0.02           | 0.07±0.01           | 0.07±0.01           | *                         | <i>n.s.</i> | <i>n.s.</i> |
| LA                     | 0.05±0.03           | 0.06±0.03           | 0.06±0.01           | 0.07±0.03           | <i>n.s.</i>               | <i>n.s.</i> | <i>n.s.</i> |
| MA                     | 19.69±1.77          | 18.92±1.83          | 24.7±7.27           | 23.22±4.2           | <i>n.s.</i>               | *           | <i>n.s.</i> |
| SA                     | 0.19±0.06           | 0.29±0.06           | 0.37±0.05           | 0.45±0.06           | ***                       | ***         | <i>n.s.</i> |
| TA                     | 1.29±0.27           | 0.94±0.21           | 0.8±0.37            | 0.66±0.12           | **                        | **          | <i>n.s.</i> |
| <b>OA-T</b>            | <b>25.21±2.45</b>   | <b>24.79±2.6</b>    | <b>29.33±7.52</b>   | <b>29.88±4.93</b>   | <i>n.s.</i>               | <i>n.s.</i> | <i>n.s.</i> |
| ALA                    | 0.6±0.11            | 0.55±0.12           | 0.43±0.07           | 0.43±0.06           | <i>n.s.</i>               | **          | <i>n.s.</i> |
| ASN                    | 6.01±1.3            | 4.09±1.12           | 4.76±1.28           | 2.95±1.02           | **                        | <i>n.s.</i> | <i>n.s.</i> |
| ASP                    | 1.54±0.34a          | 1.39±0.19a          | 0.95±0.2b           | 1.26±0.14ab         | <i>n.s.</i>               | ***         | *           |
| GABA                   | 0.86±0.24           | 0.98±0.17           | 0.62±0.1            | 0.51±0.1            | <i>n.s.</i>               | *           | <i>n.s.</i> |
| GLN                    | 6.13±2.22           | 2.3±0.8             | 3.58±0.45           | 1.32±0.46           | ***                       | **          | <i>n.s.</i> |
| GLU                    | 2.69±0.85a          | 1.76±0.47c          | 1.87±0.17bc         | 2.14±0.19b          | **                        | *           | *           |
| ILE                    | 0.15±0.04ab         | 0.16±0.03ab         | 0.22±0.13a          | 0.13±0.03b          | <i>n.s.</i>               | *           | *           |
| PHE                    | 0.13±0.04b          | 0.24±0.04a          | 0.11±0.05b          | 0.14±0.02b          | ***                       | <i>n.s.</i> | *           |
| THR                    | 0.45±0.13           | 0.31±0.05           | 0.45±0.15           | 0.24±0.07           | **                        | <i>n.s.</i> | <i>n.s.</i> |
| VAL                    | 0.27±0.07           | 0.3±0.03            | 0.23±0.12           | 0.17±0.02           | <i>n.s.</i>               | <i>n.s.</i> | <i>n.s.</i> |
| <b>AA-T</b>            | <b>18.85±4.13</b>   | <b>12.08±1.78</b>   | <b>13.22±2.07</b>   | <b>9.29±2.06</b>    | ***                       | **          | <i>n.s.</i> |
| CHA                    | 0.87±0.41c          | 1.16±0.68c          | 2.09±0.34b          | 3.55±0.79a          | <i>n.s.</i>               | ***         | *           |
| MCTA                   | 0.08±0.02           | 0.07±0.03           | 0.14±0.04           | 0.14±0.03           | <i>n.s.</i>               | **          | <i>n.s.</i> |
| <b>HCA-T</b>           | <b>0.95±0.42c</b>   | <b>1.23±0.69c</b>   | <b>2.23±0.38b</b>   | <b>3.68±0.8a</b>    | <i>n.s.</i>               | ***         | *           |
| CI                     | 0.66±0.27           | 0.21±0.07           | 0.62±0.11           | 0.22±0.05           | ***                       | <i>n.s.</i> | <i>n.s.</i> |
| MI                     | 5.76±0.58           | 5±0.39              | 3.83±0.64           | 3.4±0.55            | **                        | ***         | <i>n.s.</i> |
| SI                     | 0.19±0.05           | 0.45±0.09           | 0.16±0.05           | 0.39±0.09           | ***                       | <i>n.s.</i> | <i>n.s.</i> |
| QA                     | 0.38±0.06           | 0.24±0.05           | 0.3±0.03            | 0.19±0.02           | ***                       | **          | <i>n.s.</i> |
| <b>POL-T</b>           | <b>7±0.88</b>       | <b>5.89±0.5</b>     | <b>4.91±0.68</b>    | <b>4.2±0.54</b>     | **                        | ***         | <i>n.s.</i> |
| CHN                    | 1.2±0.11            | 1.3±0.09            | 1.23±0.18           | 1.36±0.08           | <i>n.s.</i>               | <i>n.s.</i> | <i>n.s.</i> |
| ETA                    | 0.8±0.22            | 0.96±0.16           | 0.78±0.09           | 0.74±0.14           | <i>n.s.</i>               | <i>n.s.</i> | <i>n.s.</i> |
| <b>OTR-T</b>           | <b>2.01±0.27</b>    | <b>2.26±0.2</b>     | <b>2.01±0.26</b>    | <b>2.1±0.21</b>     | *                         | <i>n.s.</i> | <i>n.s.</i> |

a, Nutritive compounds. Carbohydrates: GLC, Glucose; FRU, Fructose; INUL, inulin; KES, Kestose; SUC, Sucrose; CAR-T, total carbohydrates. Organic acids: CA, Citric acid; FA, Fumaric acid; LA, Lactic acid; MA, Malic acid; SA, Succinic acid; TA, Tartaric acid; OA-T, total organic acids. Amino acids: ALA, Alanine; ASN, Asparagine; ASP, Aspartic acid; GABA, γ-Aminobutyric acid; GLN, Glutamine; GLU, Glutamic acid; ILE, Isoleucine; PHE, Phenylalanine; THR, Threonine; VAL, Valine; AA-T, total amino acids. Hydroxycinnamic acids: CHA, Chicoric acid; MCTA, Monocaffeoyl tartaric acid; HCA-T, total hydroxycinnamic acids. Polyols: CI, Chiro-inositol; MI, Myo-inositol; SI, Scyllo-inositol; QA, Quinic acid; POL-T, total polyols. Others: CHN, Choline; ETA, Ethanolamine; OTR-T, total other compounds.

b, MRY, moderately rainy year; HRY, highly rainy year.

c, G, genotype; Y, year; G × Y, genotype: year interaction. Significance letters refer to G × Y effect. \*, \*\*, \*\*\* = significant at P ≤ 0.05, 0.01 and 0.001 respectively. *n.s.*, non-significant.
