# Supplementary material for: The Chloroplast Genome of Endive (Cichorium endivia L.): Cultivar Structural Variants and Transcriptome Responses to Stress Due to Rain Extreme Events
Source: MDPI journal article supplement (doi:10.3390/genes14091829), 2023-09-21
Supplement: s1 [file s1]

A)

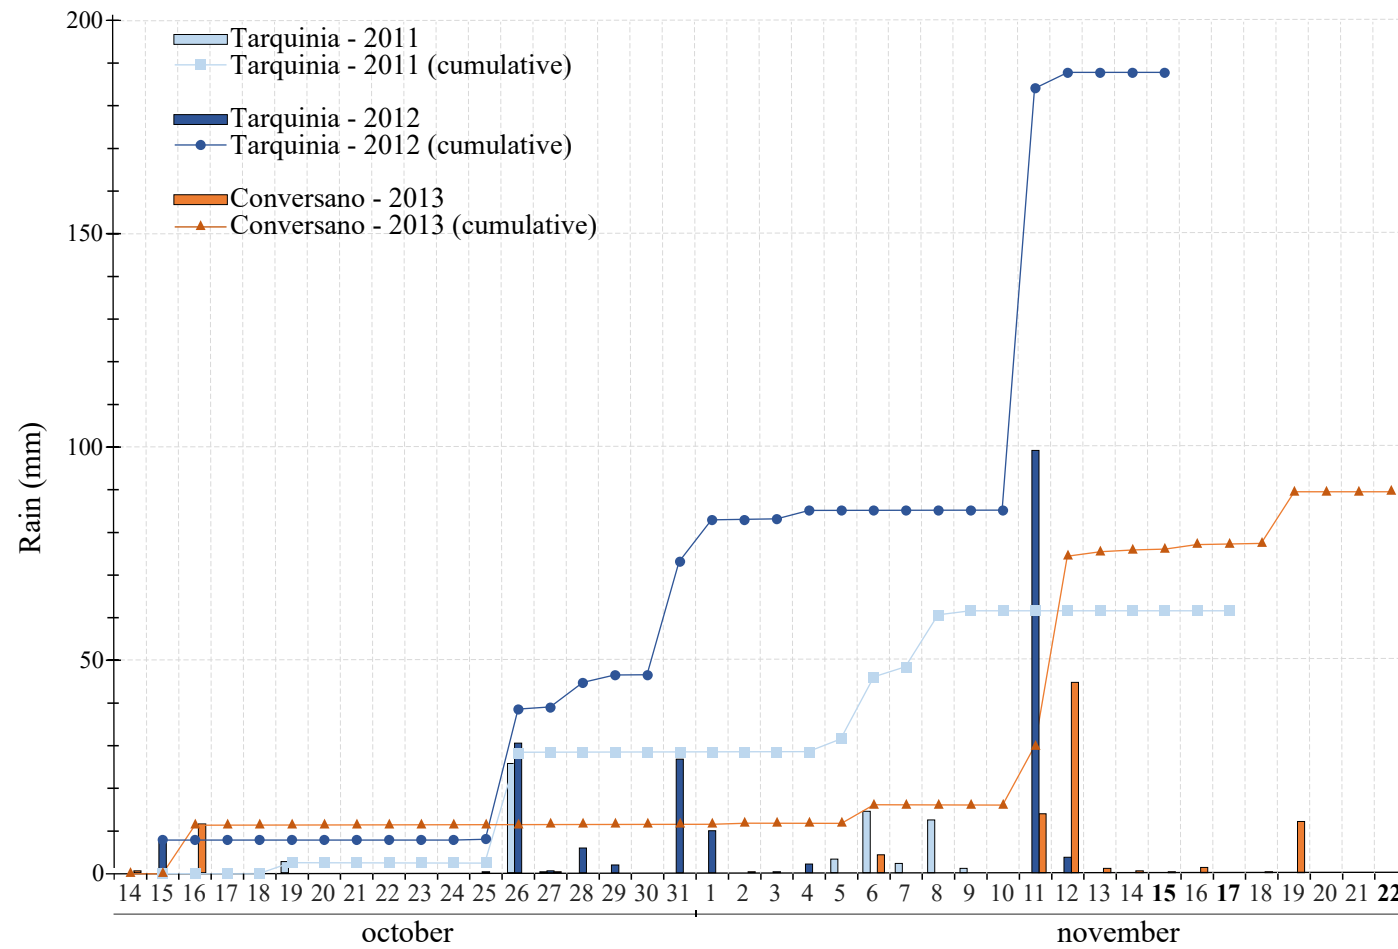

B)

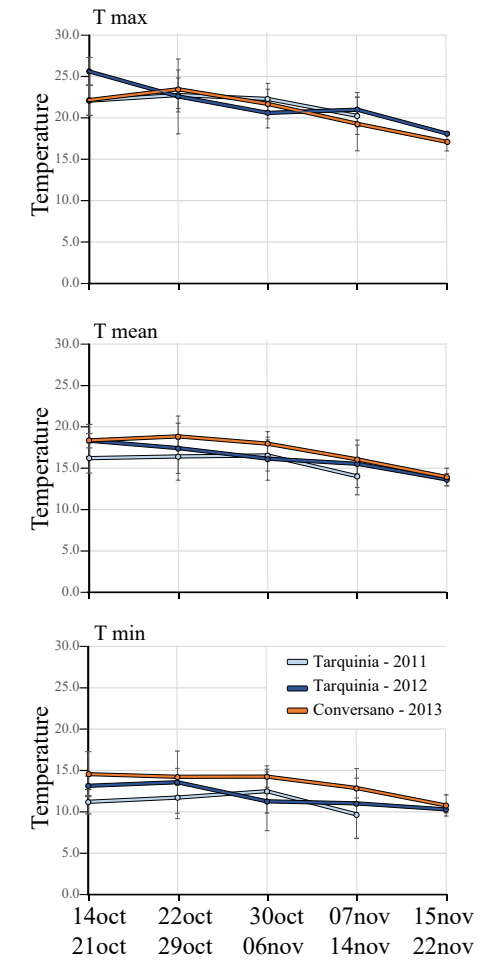

**Figure S1 Climatic data related to cultivations in Tarquinia (2011 and 2012; Lazio, Italy) and Conversano (2013; Apulia, Italy).**

A) Cumulative rainfall and rainy days (left y-axis) one month before harvest. B) Minimum, average and maximum temperature recorded in the four weeks before harvest
