# Supplementary material for: The Chloroplast Genome of Endive (Cichorium endivia L.): Cultivar Structural Variants and Transcriptome Responses to Stress Due to Rain Extreme Events
Source: MDPI journal article supplement (doi:10.3390/genes14091829), 2023-09-21
Supplement: s1 [file s1]

**Table S1.** Month average values of rain, relative humidity and temperatures of the entire cycle (September-November)

| Site – year (acronym)               | Parameters     | Sept  | Oct   | Nov         | mean±sd   |
|-------------------------------------|----------------|-------|-------|-------------|-----------|
| <b>Tarquinia - 2011</b><br>(MRY)    | T. min (°C)    | 15.53 | 11.74 | 10.51       | 12.6±2.6  |
|                                     | T. avg (°C)    | 22.15 | 17.41 | 14.85       | 18.1±3.7  |
|                                     | T. max (°C)    | 28.88 | 23.99 | 20.92       | 24.6±4.0  |
|                                     | Rain (mm)      | 0.36  | 0.92  | <b>2.21</b> | 1.2±0.9   |
|                                     | Cum. rain (mm) | 4.38  | 12.28 | 54.95       | 23.9±27.2 |
|                                     | RH (%)         | 75.19 | 74.25 | 80.99       | 76.8±3.6  |
| <b>Tarquinia - 2012</b><br>(HRY+WL) | T. min (°C)    | 17.04 | 13.58 | 11.32       | 14±2.9    |
|                                     | T. avg (°C)    | 22.28 | 18.36 | 15.79       | 18.8±3.3  |
|                                     | T. max (°C)    | 27.54 | 24.45 | 20.80       | 24.3±3.4  |
|                                     | Rain (mm)      | 0.40  | 3.41  | 6.74        | 3.5±3.2   |
|                                     | Cum. rain (mm) | 0.71  | 38.88 | 164.86      | 68.2±85.9 |
|                                     | RH (%)         | 83.85 | 89.33 | 86.72       | 86.6±2.7  |
| <b>Conversano - 2013</b><br>(HRY)   | T. min (°C)    | 15.98 | 14.63 | 12.42       | 14.3±1.8  |
|                                     | T. avg (°C)    | 20.48 | 18.60 | 15.74       | 18.3±2.4  |
|                                     | T. max (°C)    | 24.98 | 22.57 | 19.07       | 22.2±3.0  |
|                                     | Rain (mm)      | 0.57  | 1.25  | <b>3.55</b> | 1.8±1.6   |
|                                     | Cum. rain (mm) | 0.73  | 35.48 | 81.97       | 39.4±40.8 |
|                                     | RH (%)         | 64.83 | 77.13 | 78.32       | 73.4±7.5  |

MRY, moderately rainy year

HRY+WL, highly rainy year and waterlogging

HRY, highly rainy year
