# Supplementary material for: The Chloroplast Genome of Endive (Cichorium endivia L.): Cultivar Structural Variants and Transcriptome Responses to Stress Due to Rain Extreme Events
Source: MDPI journal article supplement (doi:10.3390/genes14091829), 2023-09-21
Supplement: s1 [file s1]

A)

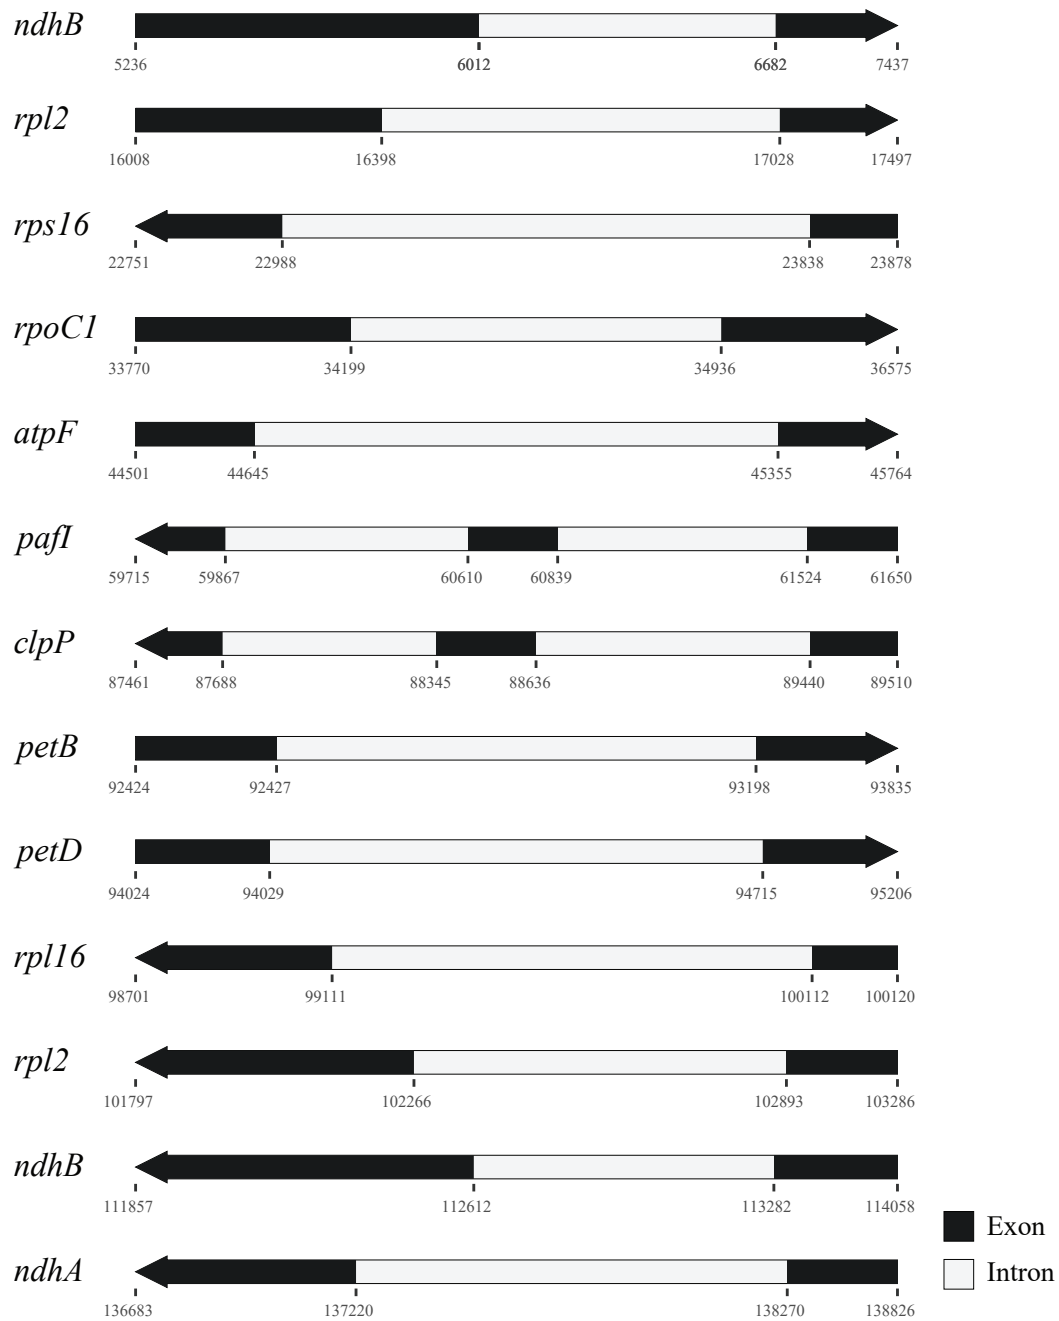

B)

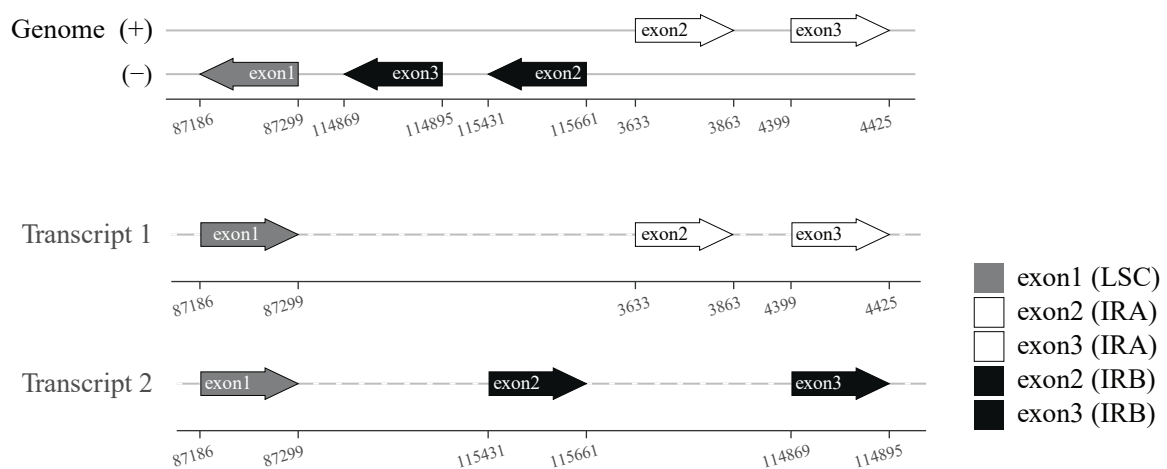

**Figure S2. Splicing events in endive chloroplast genes.** A) Cis-splicing genes. Genes are shown as oriented arrows with exons (dark boxes) and introns (white boxes). The numbers underneath mark the region boundaries. B) Trans-splicing of the *rps12* gene. Exons are reported as oriented arrows. Exon 1 was in the LSC, while exons 2 and 3 were in the IRs.
